# Supplementary material for: Identification of host–guest systems in green TADF-based OLEDs with energy level matching based on a machine-learning study
Source: Royal Society of Chemistry journal article supplement (doi:10.1039/d0cp02871a), 2020-01-01
Supplement: d0cp02871a1.pdf [file d0cp02871a1.pdf]

## Supporting Information

### Identification of Host-Guest Systems in green TADF-based OLEDs with Energy Level Matching Based on Machine-Learning Study

Min-Hsuan, Lee\*

Dr. Min-Hsuan, Lee

Rm. 312, Bldg. 11, No. 195, Sec. 4, Chung Hsing Road, Chutung, Hsinchu 310,  
Taiwan.

E-mail: itriA50587@itri.org.tw

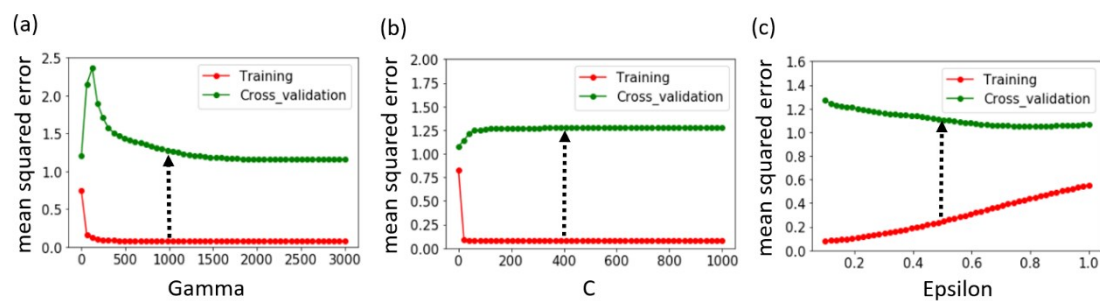

**Fig S1.** The learning curve of the SVR algorithm in 10-fold cross-validation analysis with different parameter (a)  $\gamma$  (for fixed  $C = 400$  and  $\varepsilon = 0.5$ ), (b)  $C$  (for fixed  $\varepsilon = 0.5$  and  $\gamma = 1000$ ), and (c)  $\varepsilon$  (for fixed  $\gamma = 1000$  and  $C = 400$ )

## RF Predictor

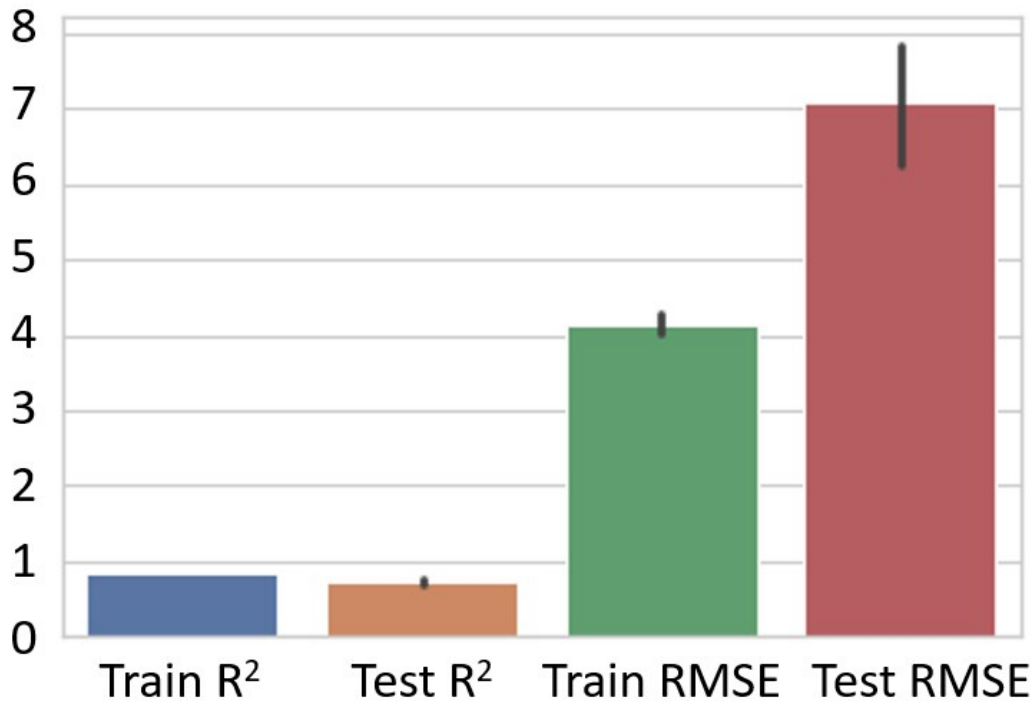

**Fig S2.** The error bar chart shows the difference in performance evaluation of the RF model

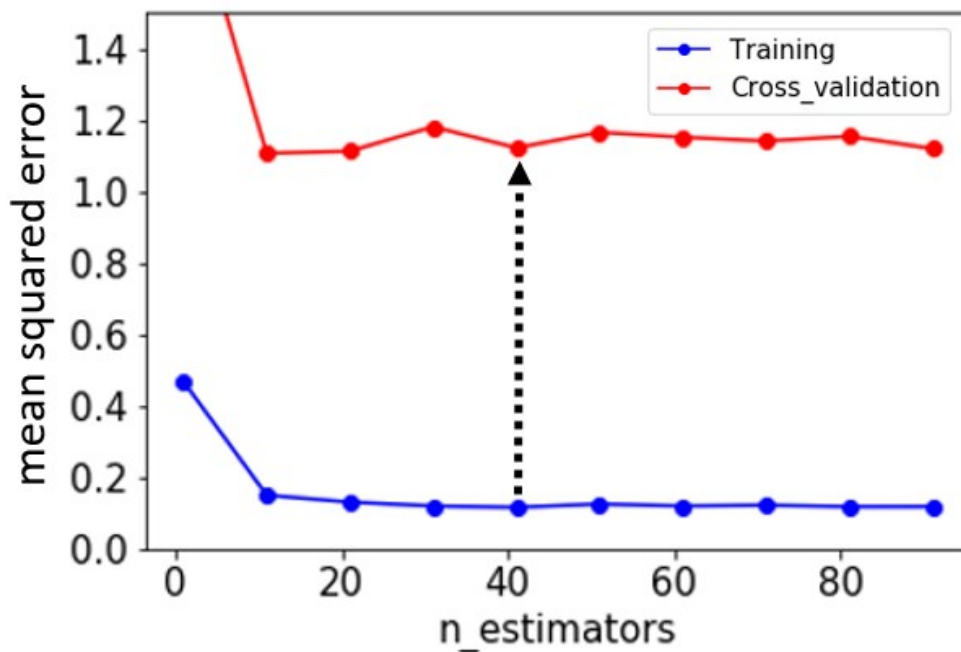

**Fig S3.** The learning curve of the RF algorithm in 10-fold cross-validation analysis with different parameter  $n\_estimators$  (for fixed  $min\_samples\_split=2$ ,  $min\_samples\_leaf=1$ )

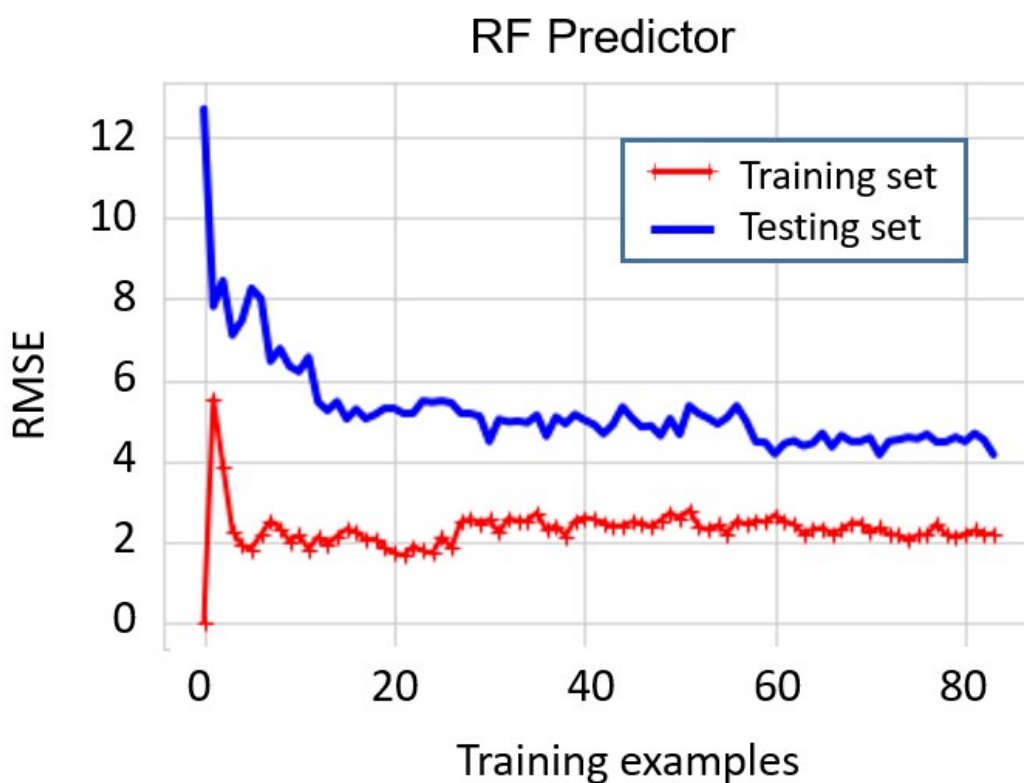

**Fig S4.** The learning curve for the RF predictor algorithm.

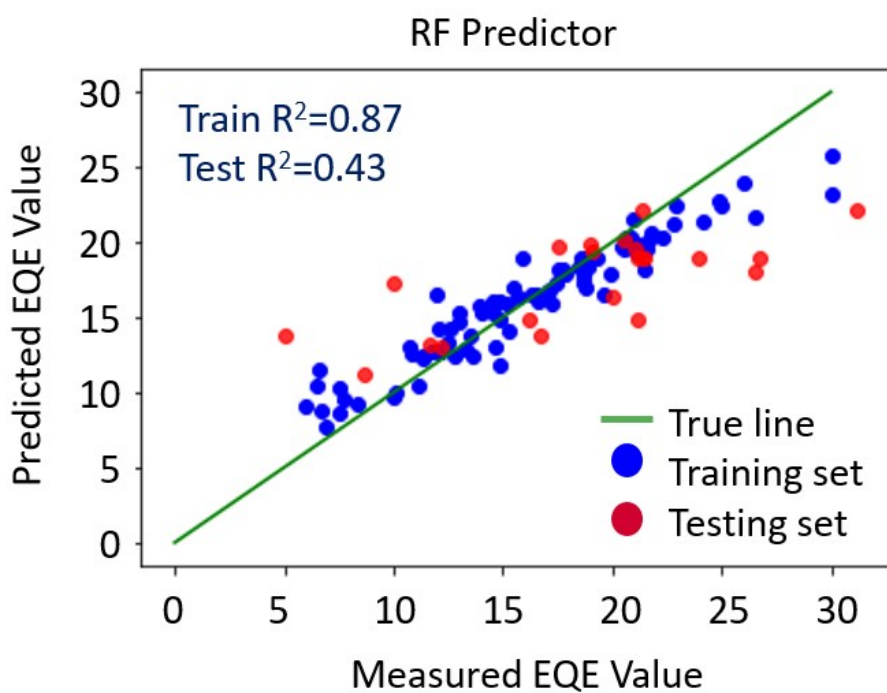

**Fig S5.** Scatter plots of measured versus predicted EQE values with RF predictor algorithm (the ratio of 8:2 between the training set and testing set)

**Table S1.** Average  $R^2$  (training set), and  $R^2$  (testing set) from 10 experiments of Random Forest algorithm. The highest  $R^2$  is in experiment #5. The optimized hyperparameters:  $n\_estimators = 40$ ,  $min\_samples\_split = 2$ ,  $min\_samples\_leaf = 1$

| Experiment | $R^2$ (Training set) | $R^2$ (Testing set) |
|------------|----------------------|---------------------|
| 1          | 0.85                 | 0.83                |
| 2          | 0.84                 | 0.69                |
| 3          | 0.85                 | 0.70                |
| 4          | 0.85                 | 0.72                |
| 5          | 0.87                 | 0.83                |
| 6          | 0.83                 | 0.71                |
| 7          | 0.86                 | 0.72                |
| 8          | 0.84                 | 0.70                |
| 9          | 0.87                 | 0.72                |
| 10         | 0.84                 | 0.77                |
| Average    | 0.85                 | 0.74                |

**Table S2.** All 108 data points from the literature for the machine-learning model

| Guest materials | PLQY (%) | Host materials | EQE (%) | DOI                                    |
|-----------------|----------|----------------|---------|----------------------------------------|
| 4CzIPN          | 93.8     | CBP            | 19.3    | DOI: 10.1038/nature11687.              |
| 4CzIPN          | 93.8     | 3CzPFP         | 31.2    | DOI: 10.1021/acsami.5b01220            |
| 4CzIPN          | 93.8     | DCzDCN         | 26.7    | DOI:10.1002/adma.201402188             |
| 4CzIPN          | 93.8     | BCPO           | 19.1    | DOI.org/10.1016/j.orgel.2014.04.035    |
| 4CzIPN          | 93.8     | PPO27          | 24.2    | DOI.org/10.1021/am501301g              |
| 4CzIPN          | 93.8     | pCzB-2CN       | 22.9    | DOI: 10.1021/am508259u                 |
| 4CzIPN          | 93.8     | mCzB-2CN       | 26      | DOI: 10.1021/am508259u                 |
| 4CzIPN          | 93.8     | oCzB-2CN       | 20.9    | DOI: 10.1021/am508259u                 |
| 4CzIPN          | 93.8     | SF33           | 20.6    | DOI.org/10.1002/adma.201501376         |
| 4CzIPN          | 93.8     | SF34           | 22.3    | DOI.org/10.1002/adma.201501376         |
| 4CzIPN          | 93.8     | 3TPAPFP        | 21.2    | DOI.org/10.1021/cm403358h              |
| 4CzIPN          | 93.8     | 4TPAPFP        | 6.6     | DOI.org/10.1021/cm403358h              |
| 4CzIPN          | 93.8     | mCPSOB         | 26.5    | DOI.org/10.1016/j.orgel.2014.10.049    |
| 4CzIPN          | 93.8     | DBTTP1         | 18.7    | DOI: 10.1039/c5tc01065a                |
| 4CzIPN          | 93.8     | DBTTP2         | 20      | DOI: 10.1039/c5tc01065a                |
| 4CzIPN          | 93.8     | 4CN34BCz       | 21.8    | DOI: 10.1002/adma.201503782            |
| 4CzIPN          | 93.8     | CBP            | 18.8    | DOI:10.1039/C4TC02211D                 |
| t-4CzIPN        | 78       | SiCz           | 17.1    | DOI: 10.1002/adma.201402188            |
| m-4CzIPN        | 67       | SiCz           | 19.6    | DOI: 10.1002/adma.201402188            |
| 3DPA3CN         | 100      | DPEPO          | 21.4    | DOI: 10.1039/c5cc00511f                |
| BFCz-2CN        | 85       | mCP            | 12.1    | DOI: 10.1039/c5cc01940k                |
| BTCz-2CN        | 85       | mCP            | 11.8    | DOI: 10.1039/c5cc01940k                |
| Ac-VPN          | 86       | mCBP           | 18.9    | DOI.org/10.1002/adfm.201505106         |
| Px-VPN          | 77       | mCBP           | 14.9    | DOI.org/10.1002/adfm.201505106         |
| DCN3            | 39       | PPT            | 13.3    | DOI.org/10.1016/j.synthmet.2015.07.008 |
| DHPZ-2BN        | 35.2     | mCBP           | 6       | DOI: 10.1039/c4tc02530j                |
| 5CzBN           | 70       | mCBP           | 16.7    | DOI:10.1039/C5MH00258C                 |
| 5TCzBN          | 86       | mCBP           | 21.2    | DOI:10.1039/C5MH00258C                 |
| CPC             | 91.3     | mCP            | 21.2    | DOI: 10.1021/acsami.5b05648            |
| CPC             | 91.3     | 26DCZPPY       | 15.5    | DOI: 10.1021/acsami.5b05648            |
| 33TCzPN         | 87       | DPEPO          | 17.9    | DOI:10.1039/C5CC07999C                 |

|                       |      |        |      |                                     |
|-----------------------|------|--------|------|-------------------------------------|
| 33TCzT<br>Trz         | 87   | DPEPO  | 25   | DOI: 10.1021/acs.jpcc.5b09114       |
| ACRFL<br>CN<br>(ACRF) | 67.3 | TPSi-F | 10.1 | DOI: 10.1002/anie.201206289.        |
| ACRFL<br>CN<br>(ACRF) | 67.3 | PYD2   | 7.7  | DOI.org/10.1016/j.orgel.2014.05.027 |
| ACRFL<br>CN<br>(ACRF) | 67.3 | CzSi   | 8.4  | DOI.org/10.1016/j.orgel.2014.05.027 |
| ACRFL<br>CN<br>(ACRF) | 67.3 | DPEPO  | 12.2 | DOI.org/10.1016/j.orgel.2014.05.027 |
| PXZ-<br>TRZ           | 65.7 | CBP    | 12.5 | DOI: 10.1039/c2cc36237f             |
| DMAC-<br>TRZ          | 83   | mCPCN  | 26.5 | DOI:10.1039/C5CC05022G              |
| ATP-<br>PXZ           | 63   | CBP    | 11.7 | DOI: 10.1088/1468-6996/15/3/034202  |
| m-ATP-<br>PXZ         | 81   | mCP    | 12.6 | DOI: 10.1088/1468-6996/15/3/034202  |
| ATP-<br>ACR           | 49   | mCP    | 7.5  | DOI: 10.1088/1468-6996/15/3/034202  |
| m-ATP-<br>ACR         | 52   | mCBP   | 8.7  | DOI: 10.1088/1468-6996/15/3/034202  |
| m-ATP-<br>CDP         | 77   | mCP    | 7.5  | DOI: 10.1088/1468-6996/15/3/034202  |
| 4CzCNp<br>y           | 54.9 | mCP    | 11.3 | DOI.org/10.1002/adom.201500016      |
| Ac-HPM                | 77   | DPEPO  | 20.9 | DOI:10.1039/C5T C04057D             |
| Ac-PPM                | 79   | DPEPO  | 19   | DOI:10.1039/C5T C04057D             |
| Ac-<br>MPM            | 80   | DPEPO  | 20.4 | DOI:10.1039/C5T C04057D             |
| DHPZ-<br>2BTZ         | 33   | mCBP   | 5    | DOI:10.1039/C4TC02530J              |
| DHPZ-<br>2BI          | 67.6 | mCBP   | 12   | DOI:10.1039/C4TC02530J              |
| 2PXZ-<br>OXD          | 87   | DPEPO  | 14.9 | DOI:10.1039/C3TC30699B              |
| bis-PXZ-<br>TDZ       | 68.5 | DPEPO  | 10   | DOI: 10.1021/jp510751n              |
| Px2BP                 | 70   | mCP    | 10.7 | DOI.org/10.1002/anie.201402992      |
| p-<br>Px2BBP          | 36   | mCBP   | 6.9  | DOI.org/10.1002/anie.201402992      |
| AcPmBP<br>X           | 46   | mCBP   | 10   | DOI:10.1039/C4DT03608E              |
| PxPmBP                | 57   | mCBP   | 11.3 | DOI:10.1039/C4DT03608E              |

|                    |      |            |       |                                      |
|--------------------|------|------------|-------|--------------------------------------|
| X                  |      |            |       |                                      |
| PXZ-DPS            | 90   | CBP        | 17.5  | DOI.org/10.1038/nphoton.2014.12      |
| PTSOPO             | 80   | DPEPO      | 17.7  | DOI.org/10.1016/j.orgel.2015.11.019  |
| PTSOPT             | 14   | DPEPO      | 17    | DOI.org/10.1016/j.orgel.2015.11.019  |
| TXO-PhCz           | 83   | mCP        | 21.5  | DOI.org/10.1002/adma.201401393       |
| TXO-TPA            | 90.2 | mCP        | 18.5  | DOI.org/10.1002/adma.201401393       |
| ACRDS O2           | 71   | CBP        | 17.5  | DOI.org/10.1002/adma.201503225       |
| PXZDS O2           | 62   | CBP        | 15.2  | DOI.org/10.1002/adma.201503225       |
| DPO-TXO2           | 80   | CBP        | 6.5   | DOI:10.1039/C5TC03849A.              |
| DPO-TXO2           | 80   | DPEPO      | 13.5  | DOI:10.1039/C5TC03849A.              |
| PXZ-Mes3B          | 92   | CBP        | 22.8  | DOI: 10.1002/ange.201508270          |
| 2DAC-Mes3B         | 100  | DPEPO      | 21.6  | DOI: 10.1002/ange.201508270          |
| DAC-Mes3B          | 87   | DPEPO      | 14    | DOI: 10.1002/ange.201508270          |
| 4CzIPN             | 93.8 | Sy-Hosted  | 21.2  | DOI: 10.1021/acsami.8b02766          |
| 4CzIPN             | 93.8 | Asy-Hosted | 16.6  | DOI: 10.1021/acsami.8b02766          |
| PPZTPI             | 73   | CBP        | 20.52 | DOI: 10.1039/C7TC05576E              |
| PPZPPI             | 99   | CBP        | 21.06 | DOI: 10.1039/C7TC05576E              |
| CzSOX O            | 51.2 | mCP        | 13.6  | DOI: 10.1021/acsami.5b12559          |
| oPTC               | 46.6 | mCP        | 19.9  | DOI: 10.1021/acsami.6b03954          |
| mPTC               | 54.9 | mCP        | 17.4  | DOI: 10.1021/acsami.6b03954          |
| 2DPyM mDTC         | 59   | mCBP       | 12.8  | DOI: 10.1021/jacs.7b03848            |
| 4CzIPN             | 93.8 | CBP        | 18.6  | DOI.org/10.1016/j.optmat.2018.10.002 |
| 4CzIPN             | 93.8 | o-mCPBI    | 18.7  | DOI: 10.1021/acsami.5b10464          |
| Cuprous Complexes1 | 33.1 | mCP        | 14.81 | DOI: 10.1021/acs.inorgchem.6b01847   |
| Cuprous Complexes2 | 31.7 | mCP        | 11.17 | DOI: 10.1021/acs.inorgchem.6b01847   |
| Cuprous Complexes3 | 31.5 | mCP        | 6.67  | DOI: 10.1021/acs.inorgchem.6b01847   |
| 4CzIPN             | 93.8 | CzTrz      | 15.9  | DOI.org/10.1016/j.jiec.2018.09.040   |

|                 |      |              |      |                                       |
|-----------------|------|--------------|------|---------------------------------------|
| DPA-o-Trz       | 80   | mCP          | 17.2 | DOI: 10.3938/jkps.72.873              |
| MPA-o-Trz       | 80   | mCP          | 16.3 | DOI: 10.3938/jkps.72.873              |
| PXZPD<br>O      | 68   | CBP          | 18.8 | DOI: 10.1021/jacs.8b04795             |
| PXZDM<br>ePDO   | 54   | CBP          | 12.2 | DOI: 10.1021/jacs.8b04795             |
| DMACP<br>DO     | 86   | CBP          | 23.9 | DOI: 10.1021/jacs.8b04795             |
| DMACD<br>MePDO  | 64   | CBP          | 14.6 | DOI: 10.1021/jacs.8b04795             |
| 4CzIPN          | 93.8 | Cz-S         | 10.8 | DOI.org/10.1016/j.dyepig.2018.12.001  |
| 4CzIPN          | 93.8 | Cz-SO2       | 15.3 | DOI.org/10.1016/j.dyepig.2018.12.001  |
| 4CzIPN          | 93.8 | 2Cz-S        | 16.5 | DOI.org/10.1016/j.dyepig.2018.12.001  |
| 4CzIPN          | 93.8 | 2Cz-SO2      | 14.5 | DOI.org/10.1016/j.dyepig.2018.12.001  |
| IndCzpT<br>r-1  | 73.9 | mCBP         | 14.5 | DOI: 10.1039/C8TC01419A               |
| IndCzpT<br>r-2  | 66.2 | mCBP         | 30   | DOI: 10.1039/C8TC01419A               |
| SBDBQ-<br>DMAC  | 74   | CBP          | 13   | DOI: 10.1039/C7SC04669C               |
| 22bpmA<br>c     | 38   | DPEPO        | 15.7 | DOI:<br>10.1021/acs.chemmater.8b00006 |
| 25bpmA<br>c     | 60   | DPEPO        | 20.5 | DOI:<br>10.1021/acs.chemmater.8b00006 |
| 55bpmA<br>c     | 57   | DPEPO        | 24.9 | DOI:<br>10.1021/acs.chemmater.8b00006 |
| 4CzIPN          | 93.8 | CBP          | 21.5 | DOI.org/10.1016/j.orgel.2014.10.049   |
| 4CzIPN          | 93.8 | mCPSOB       | 13   | DOI.org/10.1016/j.orgel.2014.10.049   |
| 4CzIPN          | 93.8 | DMAC-<br>DPS | 16.2 | DOI.org/10.1016/j.orgel.2016.11.010   |
| 4CzIPN          | 93.8 | PPT          | 12.1 | DOI:10.1039/C8CC03425G                |
| 4CzIPN          | 93.8 | Cz-PO        | 20.5 | DOI: 10.1021/acsami.6b13002           |
| 4CzIPN          | 93.8 | Cz-PS        | 21.7 | DOI: 10.1021/acsami.6b13002           |
| 4CzIPN          | 93.8 | Cz-Trz       | 21.4 | DOI: 10.1021/acsami.6b13002           |
| BP-<br>phIDID   | 56.9 | CBP          | 13.9 | DOI: 10.1021/acsami.7b13158           |
| Tria-<br>phIDID | 69.8 | CBP          | 20.8 | DOI: 10.1021/acsami.7b13158           |



|                |      |       |      |                                          |
|----------------|------|-------|------|------------------------------------------|
| IndCzpT<br>r-2 | 71.9 | mCBP  | 30   | DOI: 10.1039/C8TC01419A                  |
| 4CzIPN         | 93.8 | CCNCz | 17.1 | DOI.org/10.1016/j.dyepig.2019.<br>01.024 |

**Machine-learning algorithm functions used in this work within the scikit-learn**

**library:**

### **Random Forest Regression:**

#### ■ **Importing the libraries**

```
import numpy as np
import matplotlib.pyplot as plt
import pandas as pd
```

#### ■ **Importing the dataset**

```
df = pd.read_csv("TADF OLEDs experimental data.csv")
X = df.iloc[:, :-1]
y = df[['EQE']]
X_train, X_test, y_train, y_test = train_test_split(
(X,y,test_size=0.10,random_state=10)
```

#### ■ **Fitting the Random Forest Regression Model to the dataset**

```
from sklearn.ensemble import RandomForestRegressor
rfr = RandomForestRegressor (
    bootstrap=True, criterion='mse', max_depth=None,
    max_features='auto', max_leaf_nodes=None,
    min_impurity_decrease=0.0, min_impurity_split=None,
    min_samples_leaf=1, min_samples_split=2,
    min_weight_fraction_leaf=0.0, n_estimators=40, n_jobs=-1,
    oob_score=False, random_state=None, verbose=0, warm_start=False)
rfr.fit (X_train,y_train.values.ravel())
```

#### ■ **Predicting the results**

```
rfr_x_predict = rfr.predict(X_train)
rfr_y_predict = rfr.predict(X_test)
```

### **Support Vector Regression**

#### ■ **Importing the libraries**

```
import numpy as np
import matplotlib.pyplot as plt
import pandas as pd
```

#### ■ **Importing the dataset**

```
df = pd.read_csv("TADF OLEDs experimental data.csv")
X = df.iloc[:, :-1]
y = df[['EQE']]
X_train, X_test, y_train, y_test = train_test_split
```

```
(X,y,test_size=0.10,random_state=10)
```

### ■ **Fitting the Support Vector Regression Model to the dataset**

```
from sklearn import svm
```

```
svr_rbf = svm.SVR(C=40, epsilon=0.1, gamma=3000, kernel='rbf', cache_size=200,  
coef0=0.0, degree=3, max_iter=-1, shrinking=True, tol=0.001, verbose=False)
```

```
svr_rbf.fit(X_train,y_train.values.ravel())
```

### ■ **Predicting the results**

```
svr_rbf_x_predict = svr_rbf.predict(X_train)
```

```
svr_rbf_y_predict = svr_rbf.predict(X_test)
```

### **Python code of validation curve:**

```
degree = np.arange(1,100,10)
```

```
train_loss, test_loss = validation_curve(  
RandomForestRegressor(min_samples_split=2, min_samples_leaf=1),  
preprocessing.scale(X),preprocessing.scale(y),  
'n_estimators', degree, cv=10,scoring = 'neg_mean_squared_error')
```
